# Supplementary material
Source: publisher figshare collection journal article supplement (https://sage.figshare.com/ndownloader/files/40104826)
Supplement: Supplementary file 1 [file 40104826]

ID	FSI1_1	FSI2_1	FSI3_1	FSI4_1	FSI5_1	FSI6_1	TMS_1	TMS_2	TMS_3	TMS_4	TMS_5	TMS_6	TMS_7	CBI_1	CBI_2	CBI_3	CBI_4	CBI_5	CBI_6	CBI_7	CBI_8	CBI_9Attn	PDI_1	PDI_2	PDI_3	PDI_4	PDI_5	PDI_6	PDI_7	SCS_1	SCS_2	SCS_3	SCS_4	SCS_5	SCS_6	SCS_7	SCS_8	SCS_9	SCS_10	SCS_11	SCS_12	SCS_13	Back_pain	Asthma	Arthritis	TMJ	Hypertension	Stroke	Q93_7Attn
1	4	4	3	4	4	4	4	3	4	4	3	4	3	2	3	2	2	2	2	2	3	4	8	7	9	7	8	8	7	2	2	2	2	2	3	2	2	2	2	2	3	3	1	1	0	0	0	0	0
5	6	7	7	7	7	7	4	3	3	3	3	3	3	5	4	4	4	2	3	4	1	4	1	1	1	5	5	1	1	4	3	3	3	3	3	3	3	3	3	3	3	3	1	0	0	0	0	0	0
8	4	4	4	4	5	5	1	1	1	1	1	3	3	3	3	4	3	4	4	4	3	4	8	8	8	8	6	6	6	5	5	5	5	5	5	5	5	5	5	5	5	5	1	0	1	0	0	0	0
10	4	3	4	3	4	7	3	3	2	4	3	4	3	5	4	3	3	3	4	2	2	4	5	6	5	7	5	7	5	3	4	5	3	9999	3	4	3	4	3	4	3	4	1	1	0	0	0	0	0
11	1	1	1	1	3	3	2	2	3	2	3	3	2	1	3	2	3	1	4	2	2	4	4	5	6	8	3	7	5	3	3	4	4	3	2	2	3	4	4	4	3	2	1	0	0	0	0	0	0
12	5	3	3	9999	2	1	4	3	4	4	4	4	5	2	1	5	2	5	5	2	4	4	7	10	8	9	7	2	2	1	2	2	3	2	1	1	2	2	1	2	2	1	0	0	0	0	1	0	0
13	5	7	4	2	4	4	4	2	2	3	3	3	3	2	3	4	2	3	2	3	4	4	6	4	3	2	1	2	4	3	3	3	3	2	2	2	3	3	3	3	3	3	1	1	1	0	0	0	0
14	3	3	3	3	3	2	2	2	3	3	2	3	3	3	3	4	2	4	3	3	4	4	5	3	4	5	2	4	5	4	1	1	2	1	1	2	2	1	1	2	2	1	1	0	0	0	1	0	0
15	4	5	3	3	5	6	1	3	1	3	1	4	4	4	4	4	4	4	4	4	4	4	4	5	6	5	6	5	6	5	5	5	5	5	5	5	5	5	5	5	5	4	1	0	0	0	1	0	0
16	6	6	6	5	7	7	1	2	2	3	2	3	2	5	4	5	5	5	4	4	5	4	7	7	6	8	7	8	8	1	1	2	1	3	3	2	2	3	1	3	4	2	1	0	1	0	0	0	0
17	7	7	7	7	7	7	3	3	4	3	4	3	4	5	5	1	5	2	5	5	1	4	2	1	2	3	1	1	1	1	4	4	5	4	4	5	4	4	5	4	4	5	0	0	0	0	0	0	0
18	4	3	3	4	5	4	3	4	4	3	3	4	4	3	2	4	2	4	2	2	4	4	7	8	6	8	5	5	3	3	4	4	3	3	3	4	4	3	3	3	4	4	1	0	1	0	0	0	0
19	4	4	4	5	5	4	3	3	3	4	5	4	5	4	3	4	3	5	2	3	4	4	7	7	6	5	4	4	2	4	3	3	3	3	3	3	4	4	2	4	3	3	1	0	0	0	0	0	0
21	5	7	7	4	6	3	3	3	3	2	3	4	5	4	5	2	5	4	1	2	1	4	9	7	10	6	3	7	9	4	5	2	2	1	1	2	2	2	1	3	2	3	0	0	1	0	0	0	0
22	6	6	5	6	5	6	4	3	4	3	4	3	4	5	4	3	4	4	5	4	5	4	8	6	8	7	8	6	7	4	3	4	3	4	3	4	3	4	3	4	3	4	1	1	0	0	0	1	0
23	4	6	5	6	5	5	4	3	4	3	4	3	4	5	4	5	5	4	5	5	4	4	5	4	8	5	7	4	6	3	2	3	2	3	4	2	2	3	2	3	2	5	1	0	0	0	0	0	0
27	2	2	2	2	2	2	3	3	3	3	3	3	3	2	2	2	2	2	2	2	2	4	5	5	6	5	5	5	5	3	3	3	3	3	3	3	3	3	3	3	3	3	0	0	0	0	1	0	0
28	7	1	1	1	4	1	1	1	5	1	5	1	5	1	2	1	2	5	1	3	3	4	8	9	10	2	10	2	4	1	1	1	1	1	1	1	1	1	1	1	1	1	1	0	1	0	0	0	0
29	5	5	4	4	5	5	2	2	3	2	3	3	2	4	3	4	3	4	3	3	3	4	6	4	7	7	6	7	9	3	4	3	3	2	2	2	3	3	2	3	3	3	1	0	0	0	0	0	0
30	5	5	5	5	5	5	3	4	4	4	3	4	4	4	4	4	4	4	3	4	3	4	1	4	5	3	10	2	2	4	4	4	4	4	4	4	4	4	4	4	4	4	0	0	0	0	0	0	0
31	1	1	4	2	5	4	1	2	2	2	2	4	3	2	5	4	2	4	4	3	2	4	2	4	6	8	3	1	1	3	4	5	4	4	3	4	4	4	3	3	2	5	0	0	0	0	0	0	0
32	2	2	2	3	4	3	2	2	5	3	2	1	2	3	1	5	2	5	1	1	5	4	7	6	9	8	5	7	1	1	1	1	1	1	1	1	1	1	1	2	3	1	0	0	0	0	0	0	0
33	3	1	1	1	4	2	3	1	2	1	2	1	3	2	3	5	2	5	2	3	5	4	5	6	5	5	2	6	1	4	5	2	3	3	2	3	1	1	2	2	1	3	0	0	1	1	0	0	0
34	4	4	4	9999	5	5	2	4	3	4	3	4	3	4	4	3	3	4	4	4	5	4	5	5	5	4	2	4	3	5	5	5	5	5	4	5	5	5	4	3	4	5	1	1	0	0	0	0	0
35	6	6	5	5	5	5	4	4	4	4	4	3	4	3	4	3	4	4	3	4	3	4	9	8	8	9	7	7	8	4	3	4	3	4	4	3	3	9999	3	4	3	4	1	0	0	0	0	0	0
36	5	5	4	4	5	6	3	4	2	4	3	3	3	4	4	3	4	4	4	5	3	4	3	3	2	2	4	2	3	4	3	4	4	4	3	4	4	3	3	2	3	3	0	1	1	1	0	0	0
37	4	4	5	5	5	6	1	1	1	1	1	5	4	5	5	4	4	4	5	5	4	4	1	1	2	4	1	2	2	4	5	4	4	4	3	4	3	4	3	4	3	4	1	0	0	0	1	0	0
38	3	1	3	2	2	4	4	3	4	1	2	2	1	5	4	4	4	5	1	5	2	4	7	7	7	7	9	4	4	4	1	1	1	1	1	1	1	1	1	1	1	1	1	0	0	1	0	0	0
39	2	2	3	3	3	3	4	4	3	3	3	2	3	2	4	4	4	4	3	4	3	4	8	9	7	9	8	6	4	2	2	2	2	2	2	2	2	2	2	2	1	2	1	1	1	0	0	0	0
40	2	3	5	5	6	7	2	1	2	2	3	3	2	4	4	3	4	5	4	4	5	4	2	4	4	3	1	1	4	4	3	2	3	3	3	4	2	3	4	4	4	4	1	0	0	0	1	0	0
41	5	6	5	5	6	7	2	3	4	5	3	5	4	5	5	1	5	3	4	5	1	4	1	1	1	1	1	1	1	4	5	4	4	5	5	4	5	5	4	4	5	4	0	0	0	0	0	0	0
42	6	6	4	5	4	5	1	4	2	3	3	4	3	5	5	2	5	1	5	5	1	4	2	2	1	1	3	1	2	4	4	5	4	4	4	4	5	4	4	4	5	4	1	0	0	0	0	0	0
43	5	5	7	7	5	4	3	4	5	5	5	5	5	5	4	4	5	5	5	4	4	4	6	6	6	6	5	6	5	3	3	3	3	3	3	3	5	5	5	5	4	4	1	1	0	0	0	0	0
44	4	4	5	5	5	7	4	2	4	4	4	4	5	5	5	5	4	4	5	5	5	4	4	4	4	3	7	5	2	4	5	5	5	5	5	5	4	4	4	5	4	5	0	0	0	0	0	0	0
45	2	3	3	2	2	4	3	1	3	2	4	3	3	4	5	2	3	5	2	5	2	4	7	9	9	10	6	6	7	2	3	2	3	3	1	2	2	2	2	2	2	2	1	0	1	0	0	0	0
46	7	6	6	6	6	1	1	1	3	1	2	1	1	1	1	5	2	5	1	5	3	4	3	3	2	4	1	1	1	1	1	1	1	1	1	1	1	1	1	1	1	1	0	0	0	0	0	0	0
47	1	1	1	1	1	2	5	2	4	4	3	2	5	1	1	1	3	5	1	4	3	4	3	9	10	7	10	2	2	2	1	2	1	1	2	2	2	2	1	4	1	1	0	0	0	0	1	0	0
48	6	5	4	3	5	5	3	2	2	4	4	5	3	5	4	3	4	4	4	5	2	4	6	8	7	3	5	2	4	4	4	2	4	2	3	4	4	4	4	4	5	5	1	1	0	0	0	0	0
50	3	3	3	2	3	4	3	3	5	5	4	3	2	5	5	5	2	5	1	2	5	4	6	6	5	4	5	1	1	5	1	1	1	1	2	2	2	1	1	1	2	2	1	0	0	0	0	0	0
51	4	4	2	2	4	4	3	3	2	3	2	2	3	4	4	4	2	3	2	4	3	4	2	5	5	4	5	1	3	3	3	4	3	4	3	3	3	3	3	3	2	3	1	0	0	0	0	0	0
52	4	4	2	3	2	3	2	3	1	3	3	4	3	5	4	2	5	2	4	5	2	4	2	3	3	3	1	1	1	3	4	4	4	4	3	3	3	4	3	3	3	3	0	0	0	0	0	0	0
53	5	6	3	3	5	6	1	4	4	3	2	4	3	4	4	4	4	5	3	3	4	4	6	6	3	5	2	6	8	4	3	4	4	5	3	4	4	4	2	4	2	2	0	0	0	1	0	0	0
54	1	1	1	1	4	4	1	2	1	1	1	3	1	2	1	4	4	5	1	3	5	4	8	9	10	10	6	8	8	1	1	1	2	3	1	2	4	3	1	2	1	1	1	0	0	0	0	0	0
55	4	2	2	2	3	3	2	2	1	1	1	1	1	3	3	2	3	3	2	4	2	4	4	3	8	10	10	1	1	2	2	3	2	1	2	2	1	1	2	1	1	2	0	1	0	0	0	0	0
56	2	4	7	9999	7	7	3	1	4	4	4	3	3	5	3	4	4	5	2	2	5	4	9	9	9	10	6	9	2	2	4	3	3	1	3	3	2	3	3	2	3	2	1	1	0	1	1	0	0
57	6	6	5	4	6	6	1	1	1	1	1	1	1	5	4	2	5	1	4	4	2	4	1	2	1	1	1	1	1	2	2	1	5	1	2	3	1	3	2	4	1	2	0	0	1	0	0	0	0
58	7	7	7	7	1	2	1	3	2	3	4	3	3	4	2	4	3	4	4	4	4	4	2	7	5	3	2	3	2	4	4	3	3	4	4	4	4	4	3	4	4	4	1	1	1	1	1	0	0
59	4	3	5	5	7	7	2	3	1	3	1	4	2	4	3	2	2	3	4	3	2	4	5	6	6	5	8	3	3	3	3	4	4	4	2	2	2	3	1	3	3	3	1	0	0	0	0	0	0
60	4	4	4	4	6	6	1	2	1	3	4	3	4	4	4	1	4	3	4	4	2	4	3	5	4	3	2	2	1	5	4	3	4	3	4	4	5	5	5	5	4	4	0	0	1	0	0	0	0
61	2	2	2	1	1	3	1	4	3	4	4	5	4	4	3	5	2	4	4	5	5	4	2	3	3	1	2	3	2	4	5	4	4	3	4	5	5	4	4	5	4	4	1	0	0	0	0	0	0
63	2	2	4	4	5	5	4	5	4	4	2	4	4	3	4	4	4	4	1	4	4	4	8	9	9	10	10	4	6	2	1	2	3	1	1	2	1	1	1	1	1	1	1	0	1	0	0	0	0
64	3	3	2	1	3	3	3	3	4	2	3	2	2	2	2	5	3	5	3	4	4	4	5	4	8	5	5	6	5	2	1	2	2	2	2	2	1	2	1	3	3	2	0	0	0	0	0	0	0
65	4	4	4	4	5	4	2	3	2	1	2	3	3	5	4	4	5	2	4	4	3	4	1	3	4	3	6	1	1	4	5	3	3	3	2	4	3	4	3	2	1	2	1	0	0	0	0	0	0
66	7	7	7	7	7	7	2	3	3	4	2	4	3	5	5	2	5	3	5	5	2	4	1	3	5	1	1	1	1	4	5	4	5	4	4	5	4	5	4	4	4	4	1	1	0	1	0	0	0
67	7	2	1	1	1	1	1	2	2	2	1	1	1	2	1	5	1	5	1	1	3	4	8	8	8	2	10	5	4	2	1	4	4	2	2	4	1	1	1	1	1	1	1	0	0	0	0	0	0
68	3	3	5	5	4	4	4	4	4	4	2	4	4	5	5	2	5	4	4	5	3	4	9	9	3	8	7	8	9	3	2	2	3	2	1	2	4	4	2	2	2	2	1	0	0	0	1	0	0
69	6	4	1	9999	3	6	3	4	3	2	3	4	3	4	3	4	3	4	4	2	4	4	5	7	6	4	8	6	1	4	4	2	3	4	4	4	3	4	2	2	3	4	1	1	1	0	0	0	0
70	7	7	5	5	6	6	3	4	4	3	4	3	3	3	4	3	3	4	2	3	4	4	4	5	3	4	6	6	3	4	3	4	3	3	2	3	2	3	2	2	3	3	1	0	0	1	0	0	0
72	6	6	5	5	6	6	3	3	4	3	2	4	3	3	3	4	2	4	3	2	4	4	3	7	7	4	4	1	3	4	4	5	4	4	4	4	4	4	4	4	5	3	0	0	1	0	0	0	0
73	5	5	2	2	4	3	2	2	3	3	2	3	3	3	4	4	3	3	3	4	4	4	4	4	4	4	4	4	4	3	4	2	3	2	2	2	2	2	2	2	2	2	0	0	1	0	1	0	0
74	6	7	6	7	6	6	3	3	4	4	3	2	4	5	5	2	4	1	5	5	1	4	4	3	3	2	2	1	2	4	3	2	4	3	3	5	3	3	4	3	2	3	0	0	0	0	1	0	0
75	7	1	1	3	4	4	3	2	5	2	4	2	4	4	4	2	3	2	3	4	4	4	4	4	7	3	8	6	2	4	3	4	4	4	4	4	5	4	4	3	5	3	1	0	0	0	0	0	0
76	7	6	5	5	6	5	4	3	4	3	4	3	3	5	4	3	4	4	5	5	4	4	5	3	5	8	6	8	5	4	3	4	4	3	4	3	4	4	3	5	4	4	0	0	0	1	0	0	0
77	4	4	3	2	4	4	2	3	3	3	2	2	4	5	5	1	5	2	4	5	2	4	3	4	3	4	3	5	3	3	3	4	3	4	3	3	3	4	3	3	3	3	0	0	0	0	0	0	0
78	5	4	6	5	6	4	4	2	4	3	4	3	3	3	4	3	4	4	3	4	2	4	3	8	3	2	3	7	3	2	1	3	5	4	3	5	4	3	2	4	3	4	1	0	0	0	0	0	0
79	4	6	6	5	6	6	2	4	3	9999	3	4	4	4	4	2	4	2	4	4	2	4	8	8	8	8	9	8	6	5	5	5	5	5	5	5	5	5	5	5	5	5	1	1	1	1	1	0	0
80	6	5	2	5	2	2	1	2	2	2	2	2	1	4	3	4	3	3	3	3	4	4	7	7	7	7	10	7	7	3	2	2	3	2	3	2	3	3	2	2	2	2	1	0	0	0	0	0	0
81	1	1	1	1	4	4	1	5	2	3	2	3	2	5	5	4	5	3	5	3	5	4	5	7	8	5	1	8	4	3	4	3	4	2	3	2	3	1	2	2	1	3	0	0	0	0	0	0	0
82	6	6	5	5	5	5	3	2	2	1	9999	3	1	4	4	2	4	4	4	5	2	4	3	3	3	3	3	1	1	4	4	4	5	4	4	4	4	4	3	5	5	5	0	1	1	0	1	0	0
83	5	5	7	7	4	4	3	3	3	2	2	4	4	3	2	5	2	4	2	2	3	4	5	5	7	5	5	7	7	4	3	4	3	2	3	2	3	3	3	2	3	3	0	0	1	0	0	0	0
84	5	5	5	5	5	4	1	1	1	2	3	3	3	3	3	3	3	3	3	4	4	4	6	6	6	6	8	5	8	3	2	4	4	4	2	2	2	2	2	2	3	2	0	0	0	0	0	0	0
85	4	1	4	3	1	1	1	1	3	2	3	2	3	3	2	3	4	5	1	2	3	4	1	5	6	8	10	10	10	1	1	1	3	1	1	1	1	1	1	1	1	1	1	0	0	0	0	0	0
86	5	6	5	4	6	7	3	4	3	3	2	4	5	5	4	2	4	4	4	5	3	4	4	3	5	3	6	2	1	4	5	4	5	5	4	4	5	4	5	4	3	4	0	0	1	1	0	0	0
87	5	4	3	2	6	6	2	3	4	4	3	2	2	3	4	5	4	5	3	4	4	4	8	9	8	8	5	7	7	3	4	4	4	4	3	3	4	5	2	4	2	4	1	0	0	0	0	0	0
88	5	3	4	3	6	6	4	5	4	2	3	3	4	4	3	4	2	5	4	3	2	4	3	4	5	6	8	2	2	5	2	5	2	2	2	5	3	2	2	4	3	2	1	0	1	0	0	0	0
89	2	3	4	4	6	7	3	4	4	2	2	2	2	4	4	1	4	4	4	4	4	4	1	2	1	1	1	1	1	4	4	3	4	3	3	3	4	4	3	4	4	4	1	0	0	0	0	0	0
90	3	3	3	4	4	4	4	2	3	3	3	4	4	4	4	4	4	4	4	4	4	4	4	8	5	5	3	1	1	4	3	3	3	3	3	3	3	3	3	3	3	3	1	0	1	0	0	0	0
91	7	6	6	7	7	7	2	4	1	2	1	4	3	5	4	2	5	5	3	5	4	4	1	2	1	1	1	1	1	5	4	5	5	5	5	4	3	5	3	5	5	4	1	0	0	1	0	0	0
92	5	6	5	4	5	5	4	3	4	4	1	4	4	2	4	2	3	3	3	4	2	4	4	3	4	3	3	3	4	4	4	3	4	4	4	4	4	5	5	4	4	4	1	0	0	0	0	0	0
93	2	2	2	1	1	1	3	2	2	3	3	2	4	2	2	5	2	5	2	2	5	4	6	8	8	8	8	8	3	3	2	1	3	1	1	2	2	2	1	1	3	2	1	0	0	0	1	0	0
94	5	5	2	2	5	5	1	1	2	1	1	1	1	4	4	3	4	1	4	4	1	4	2	2	2	2	4	2	2	3	2	3	3	3	2	2	2	2	2	2	3	2	0	0	0	0	1	0	0
95	5	2	2	9999	3	5	2	1	2	2	1	2	1	4	3	4	1	5	1	1	5	4	7	9	7	6	5	7	7	1	1	1	2	1	1	1	1	2	2	1	4	2	0	1	1	0	0	0	0
96	5	5	5	9999	6	5	3	4	3	3	3	4	3	3	4	3	3	4	4	3	4	4	7	6	5	5	5	4	4	4	3	4	3	3	3	2	2	3	2	3	2	3	1	0	0	0	0	0	0
97	1	1	1	1	4	4	1	1	2	3	2	4	3	2	1	4	1	5	1	2	5	4	4	8	3	8	1	2	2	3	1	2	3	2	2	3	3	3	2	2	2	3	1	0	0	0	0	0	0
98	5	5	6	7	6	6	5	4	5	2	4	4	4	4	3	3	3	5	4	4	5	4	2	8	6	9	7	5	10	4	2	3	2	3	1	2	3	2	1	2	3	3	1	0	0	0	1	0	0
99	5	5	7	7	6	5	1	4	1	2	1	3	4	5	5	1	5	3	5	5	1	4	5	6	5	5	3	4	2	2	4	5	5	5	5	5	5	5	5	5	4	5	1	0	0	1	0	0	0
100	5	5	5	6	6	7	1	4	1	2	1	5	5	5	5	2	5	4	4	5	4	4	4	6	2	2	4	2	1	4	3	3	4	4	2	4	4	5	3	3	2	4	1	0	0	0	0	0	0
101	4	4	4	4	5	6	1	2	1	5	4	4	4	4	4	3	3	4	3	4	4	4	5	4	4	5	2	2	2	4	3	3	5	3	3	3	3	3	3	3	3	3	1	0	0	0	1	0	0
102	4	4	7	7	2	2	2	1	1	2	1	1	1	3	4	4	4	5	3	4	5	4	6	8	8	6	7	3	1	1	1	1	3	1	1	1	1	2	1	1	1	2	1	0	1	0	0	0	0
103	4	4	5	2	6	5	2	4	2	2	1	2	3	4	4	4	4	4	2	3	4	4	3	4	4	3	7	2	1	2	4	3	2	1	2	2	2	2	2	2	4	4	0	0	0	0	0	0	0
104	2	2	4	2	5	5	1	1	3	2	1	3	3	5	4	2	4	5	1	4	4	4	7	9	3	8	5	2	1	4	4	3	3	3	2	4	4	4	3	4	3	3	1	0	1	0	1	0	0
105	4	6	5	5	6	7	3	4	4	3	2	3	3	4	4	2	3	3	4	5	3	4	6	7	5	8	8	6	6	3	4	4	5	4	4	3	5	4	4	4	4	5	1	1	0	0	0	0	0
106	4	6	2	2	5	4	2	4	2	3	4	5	5	3	2	3	3	5	2	3	5	4	4	5	4	9	5	2	1	4	4	4	3	4	3	5	4	4	3	4	3	5	1	0	0	0	0	0	0
107	4	4	6	4	4	7	3	4	2	4	5	4	4	4	4	5	3	4	4	5	4	4	9	10	8	7	2	7	3	5	5	3	5	4	3	5	5	5	3	5	5	5	1	0	0	1	0	0	0
108	6	6	4	4	4	4	1	4	2	3	3	2	3	2	2	4	2	3	2	4	4	4	4	5	3	4	6	4	3	3	2	2	2	3	2	2	3	3	2	2	2	2	1	0	1	0	0	0	0
109	3	3	4	4	5	5	2	3	2	1	1	3	3	4	4	4	5	4	4	4	3	4	2	3	3	5	2	3	1	2	3	4	4	2	4	4	3	4	3	4	2	3	1	0	0	0	0	0	0
110	6	7	7	7	7	7	2	3	1	3	2	4	3	5	5	1	5	3	4	5	1	4	1	3	1	2	3	1	3	5	5	5	5	4	4	5	4	5	5	4	4	4	1	0	0	0	0	0	0
111	2	2	1	1	6	7	3	2	2	3	1	3	4	4	4	2	4	4	1	5	3	4	1	6	3	5	2	1	1	4	3	2	5	3	3	5	3	5	3	4	4	5	0	0	0	0	0	0	0
112	3	2	5	4	3	2	3	2	3	4	3	3	4	4	4	5	4	3	4	2	3	4	1	6	5	7	2	6	1	5	1	3	4	3	1	2	2	4	2	3	4	4	1	0	0	0	0	0	0
114	6	4	5	6	6	5	2	3	2	4	2	5	4	4	5	2	4	2	5	4	3	4	3	2	1	3	1	1	1	4	3	4	5	2	2	4	3	4	3	4	5	3	1	0	1	0	0	0	0
115	5	2	2	1	7	5	2	5	4	3	2	5	3	4	5	2	4	2	3	5	1	4	6	7	6	2	1	2	4	5	5	4	5	3	3	5	4	5	5	5	4	4	1	0	0	0	0	0	0
116	4	5	6	6	3	1	3	2	1	3	1	5	4	3	4	3	4	5	4	4	4	4	8	9	5	7	9	1	1	3	4	3	3	2	3	4	1	3	4	5	2	3	0	0	0	0	1	0	0
118	5	4	4	4	5	4	1	3	3	2	2	3	2	5	5	3	5	4	4	5	2	4	5	6	6	4	3	1	3	4	4	4	4	4	4	4	4	4	4	4	4	4	0	0	1	0	1	0	0
119	5	5	3	2	3	2	2	1	2	3	4	2	3	3	3	3	4	2	4	4	2	4	3	8	9	2	9	1	7	1	1	2	3	1	1	1	1	2	1	1	2	2	0	0	0	0	0	0	0
120	1	1	1	1	4	4	3	2	2	3	2	2	2	4	4	4	3	3	4	4	3	4	4	5	4	4	7	4	3	2	3	2	3	2	2	3	3	3	1	2	2	2	1	0	0	0	1	0	0
121	3	2	1	1	5	4	5	1	3	1	1	1	3	3	3	3	4	5	1	2	5	4	5	8	4	5	10	5	6	2	5	5	4	4	2	3	4	4	2	2	1	3	1	0	0	0	1	0	0
122	7	7	7	7	7	7	3	3	4	4	2	2	4	5	5	2	5	2	5	5	2	4	2	4	3	2	4	2	1	3	2	1	4	1	2	4	2	3	2	3	3	2	0	0	0	0	0	0	0
123	6	5	7	7	7	7	1	4	3	4	2	4	4	4	4	3	4	4	3	5	3	4	7	6	2	8	3	1	1	4	3	4	5	3	2	3	3	4	4	3	3	3	1	0	0	0	0	0	0
124	4	6	7	7	7	7	2	4	3	4	5	5	3	4	4	2	4	4	5	2	3	4	7	4	8	9	4	8	10	5	5	5	5	5	3	4	5	4	5	2	3	4	0	0	0	0	0	0	0
125	6	6	5	5	7	7	1	4	2	3	2	4	4	5	5	3	4	3	4	5	3	4	1	2	1	1	1	1	1	5	4	4	4	2	3	4	4	4	3	3	5	3	1	0	0	0	1	0	0
126	5	5	6	6	6	5	4	2	4	2	4	5	4	5	5	2	5	3	5	5	2	4	5	4	6	5	6	6	5	5	4	4	4	5	3	4	4	5	3	2	3	3	1	0	1	0	0	0	0
127	4	4	5	4	5	5	3	3	4	3	3	4	3	4	4	3	4	4	4	4	3	4	6	5	5	6	6	5	5	4	3	3	3	4	4	4	4	3	3	4	4	4	1	0	1	1	0	0	0
130	5	4	3	3	4	4	2	3	4	2	3	4	4	2	4	4	2	4	3	2	4	4	3	5	7	4	8	3	1	3	2	3	4	2	2	4	2	3	2	2	2	2	1	0	1	0	0	0	0
132	3	5	6	6	6	5	1	2	4	2	3	3	2	3	4	2	3	5	4	4	4	4	2	3	2	5	3	1	1	4	3	4	2	3	3	4	4	4	4	3	3	4	1	0	0	0	0	0	0
133	6	3	6	7	4	3	3	2	3	4	3	9999	4	3	4	4	3	4	3	4	5	4	6	8	9	6	3	5	9	1	1	1	5	2	1	2	2	2	9999	3	1	1	1	0	0	1	1	0	0
134	3	4	3	3	7	7	5	3	4	4	2	3	4	3	4	4	4	5	1	4	3	4	7	9	4	3	7	6	2	2	3	2	3	4	2	3	4	3	1	3	2	3	1	0	1	0	0	0	0
135	6	6	6	5	6	6	3	3	3	3	3	3	2	4	4	3	4	4	4	4	4	4	3	5	2	4	2	2	2	2	2	2	3	2	2	2	2	4	3	2	3	2	1	0	0	0	0	0	0
136	2	2	2	2	5	5	4	3	4	3	3	2	3	4	3	4	2	5	2	4	4	4	4	3	2	2	3	2	3	3	3	2	3	3	2	4	3	3	3	3	2	3	1	0	0	0	0	0	0
137	5	6	5	6	4	5	3	4	3	3	4	4	3	4	4	3	4	2	2	5	4	4	4	5	5	4	3	2	2	4	3	4	3	4	3	3	4	4	3	3	5	4	1	0	1	0	0	0	0
138	5	7	6	6	7	6	4	4	5	4	4	4	5	2	3	4	5	5	3	2	5	4	3	4	8	6	9	2	1	4	5	5	3	5	4	4	5	5	4	4	4	4	1	0	0	0	0	0	0
139	4	4	4	4	4	6	1	2	2	2	2	4	4	4	4	4	4	2	4	4	2	4	6	2	2	2	10	2	2	2	4	3	3	3	3	3	3	3	3	3	3	3	1	0	1	1	0	0	0
142	5	4	6	6	6	5	3	4	4	4	3	4	4	4	4	3	4	4	4	4	3	4	6	7	6	6	3	3	6	4	4	4	4	4	4	4	4	4	4	4	4	4	0	0	0	0	1	0	0
143	4	3	2	3	4	5	2	3	3	3	2	3	2	4	4	3	4	3	3	4	3	4	1	4	2	3	3	1	1	3	4	3	3	4	3	3	3	3	3	3	2	2	1	0	0	0	0	0	0
144	5	5	5	4	5	5	1	5	2	4	3	4	3	4	4	2	4	3	4	5	2	4	4	4	5	5	4	1	1	5	5	5	5	5	5	5	5	5	5	5	5	5	0	0	0	0	0	0	0
145	3	3	3	2	4	5	3	2	4	2	3	3	2	4	3	4	3	3	4	3	3	4	4	5	3	3	2	2	1	3	3	3	4	2	2	3	3	2	3	2	2	2	0	0	0	0	0	0	0
147	5	6	2	1	5	2	4	4	2	4	2	4	4	4	4	3	4	1	4	4	4	4	8	8	10	7	10	7	10	4	3	4	4	2	2	4	4	4	2	2	3	3	1	1	1	0	0	0	0
148	5	2	1	1	4	5	3	2	1	2	1	4	2	2	3	5	2	4	3	4	5	4	5	9	7	3	9	6	2	3	3	5	5	1	2	4	4	4	2	2	1	3	1	0	0	0	0	0	0
149	5	5	5	4	5	5	3	3	2	2	2	4	3	3	4	2	4	3	3	5	3	4	1	6	8	1	8	1	1	1	2	2	2	2	1	1	2	2	2	2	1	1	1	0	0	0	0	0	0
150	2	2	4	3	2	3	3	4	3	4	4	4	4	3	3	1	4	2	3	4	3	4	8	9	9	10	9	6	1	2	2	1	3	3	1	4	2	3	2	2	1	2	1	0	1	0	0	0	0
151	6	4	2	3	5	6	3	5	5	2	3	2	3	3	3	4	3	4	2	3	4	4	2	5	7	8	9	2	2	2	1	1	1	1	1	1	2	1	1	1	1	1	1	0	0	0	0	0	0
152	5	5	5	5	3	2	1	1	1	1	1	1	1	4	3	4	3	5	3	2	4	4	4	5	5	4	5	3	7	2	1	1	1	1	1	1	1	1	1	1	1	1	1	0	0	0	0	0	0
153	1	1	1	1	4	4	1	1	2	2	1	1	2	4	4	3	4	4	4	4	3	4	2	2	2	2	2	2	4	3	3	2	4	3	1	4	4	4	2	1	2	2	0	0	0	0	1	0	0
154	3	3	5	3	4	2	4	3	3	3	4	4	3	2	2	3	2	4	4	3	3	4	6	4	6	3	5	6	4	4	5	4	3	2	3	4	3	2	3	4	3	2	0	0	0	0	0	0	0
155	5	4	3	3	3	2	3	4	2	3	2	2	3	3	3	3	4	4	2	4	3	4	5	9	9	5	9	2	2	3	2	4	4	4	1	3	3	4	1	2	2	2	1	0	0	0	0	0	0
157	6	5	3	5	5	5	1	5	2	5	3	5	4	5	5	2	5	3	4	4	3	4	3	3	8	3	1	1	1	5	4	5	5	5	2	5	3	4	3	3	3	4	0	0	0	0	1	0	0
158	5	5	4	4	5	5	3	2	2	1	2	2	1	4	4	2	4	4	2	5	4	4	3	3	3	1	5	4	3	4	4	3	4	3	2	3	3	2	3	2	2	2	0	1	0	1	0	0	0
159	5	5	4	4	5	6	2	4	4	3	2	4	5	4	4	3	4	4	4	4	3	4	3	3	1	3	2	1	1	4	4	2	4	4	3	4	4	4	3	4	2	3	1	1	0	0	0	0	0
160	3	5	6	6	7	7	2	5	4	4	2	4	3	5	4	3	4	4	4	5	2	4	7	8	10	5	1	9	2	4	3	3	4	4	4	4	4	5	2	4	3	3	1	0	0	0	0	0	0
161	6	7	7	7	7	7	2	3	3	4	3	4	4	4	5	2	3	2	4	5	1	4	3	5	1	2	8	2	1	3	4	3	5	3	4	5	3	4	3	4	5	4	1	0	0	0	0	0	0
163	6	6	6	9999	2	3	3	2	4	4	4	5	5	4	2	4	2	5	4	2	3	4	8	7	7	8	7	7	7	5	4	4	4	4	1	3	3	3	2	2	4	4	1	0	0	0	0	0	0
166	5	7	7	6	7	7	5	5	3	5	4	5	5	5	5	1	5	2	4	5	2	4	7	9	7	5	4	1	1	1	5	5	5	5	5	5	5	5	5	5	5	5	1	1	1	0	0	0	0
167	1	1	2	2	3	5	3	1	2	5	2	4	2	4	3	5	2	5	3	4	5	4	1	1	1	1	1	1	1	3	1	5	1	1	1	1	2	1	1	1	1	1	1	0	1	1	0	0	0
168	4	4	4	4	4	4	3	1	4	4	3	4	4	3	4	3	4	3	3	3	4	4	7	9	9	8	6	5	3	3	4	3	3	3	2	4	3	4	3	3	3	3	0	0	0	0	0	0	0
169	5	4	4	3	5	4	3	3	4	3	2	4	4	3	3	4	3	4	3	3	5	4	6	5	8	7	5	3	1	2	4	9999	4	4	3	4	4	4	4	4	9999	3	1	0	0	0	0	0	0
170	4	5	4	5	6	6	3	4	2	4	2	4	4	5	5	2	4	2	4	4	3	4	3	5	1	2	2	1	1	4	4	4	4	3	4	3	4	3	4	3	4	4	1	0	0	0	0	0	0
171	4	2	2	9999	5	5	1	1	3	5	4	5	5	4	4	4	3	3	4	4	3	4	4	4	4	3	1	2	1	5	3	4	3	4	2	3	5	3	3	2	4	3	0	0	0	0	0	0	0
172	6	6	6	7	4	4	1	5	2	5	2	5	5	4	5	3	4	1	5	5	1	4	8	9	10	9	10	1	1	5	4	5	4	5	4	3	5	4	2	4	5	4	1	0	1	0	1	0	0
173	5	4	3	3	5	5	3	4	3	2	3	5	4	4	4	3	4	5	2	4	4	4	8	5	9	8	10	8	2	4	3	2	3	3	2	3	4	4	4	3	2	2	1	0	1	0	1	0	0
174	3	4	4	5	5	4	3	4	3	3	2	4	4	5	4	2	4	4	3	5	3	4	4	5	1	3	3	1	2	4	3	5	4	4	4	4	4	4	3	3	3	4	0	1	0	0	1	0	0
175	3	3	5	5	6	6	2	3	2	2	3	3	3	5	5	3	5	4	3	5	3	4	4	5	7	6	5	4	4	2	2	3	3	2	2	1	2	2	1	1	2	2	1	0	0	0	1	0	0
176	5	6	5	5	7	6	2	4	3	4	2	5	4	4	4	2	5	2	4	5	2	4	5	5	4	6	5	4	7	4	5	4	4	3	4	4	5	5	4	4	5	5	0	0	1	0	0	0	0
177	7	7	7	7	1	1	1	1	1	3	3	3	4	2	2	5	2	4	1	3	5	4	4	8	9	4	10	2	2	4	1	1	4	1	1	3	1	3	1	1	1	1	1	1	1	0	1	0	0
178	5	5	5	5	5	5	4	4	4	4	4	4	4	4	4	4	4	4	4	4	4	4	3	4	3	3	3	3	3	2	2	2	2	2	2	2	2	2	2	2	2	2	1	0	0	0	0	0	0
179	2	2	2	2	3	3	1	2	1	5	1	5	4	4	4	4	4	5	1	4	3	4	6	4	2	6	4	7	7	2	3	3	2	1	2	2	1	1	1	1	2	5	1	0	0	0	0	0	0
180	5	2	2	2	4	4	1	3	1	4	4	3	4	2	3	4	4	2	3	4	4	4	4	3	4	3	3	1	1	5	4	4	5	2	3	5	5	4	3	2	5	3	0	0	0	0	0	0	0
181	6	7	7	7	5	5	5	4	4	4	4	5	5	5	3	4	2	4	3	4	5	4	6	9	7	3	9	2	2	4	3	5	5	5	3	4	4	5	4	3	2	3	0	0	1	0	1	0	0
182	6	2	6	4	5	5	3	4	4	3	2	4	2	5	4	1	4	4	4	5	1	4	7	7	4	4	10	2	2	5	3	4	5	5	3	4	4	4	5	3	5	5	1	0	0	0	0	0	0
183	4	5	1	1	1	4	1	3	3	1	1	1	3	3	3	5	3	4	3	2	5	4	7	6	3	7	5	2	5	3	1	5	5	1	1	5	3	3	3	3	3	3	1	1	1	0	0	0	0
184	5	5	5	5	6	6	2	2	2	2	2	2	2	4	4	3	4	3	4	4	3	3	3	5	4	3	6	3	3	4	4	4	4	4	4	4	4	4	4	4	4	4	1	0	0	0	1	0	0
186	4	4	5	5	6	5	4	2	3	3	2	4	4	4	2	2	3	4	4	3	4	4	6	5	8	7	8	8	8	3	4	5	4	4	4	3	4	4	4	3	3	3	0	0	0	0	1	0	0
187	7	7	5	4	6	6	3	5	4	3	4	5	4	5	5	2	5	2	5	5	1	4	2	5	2	2	5	2	1	4	4	3	2	2	4	3	4	4	4	4	3	3	0	0	0	0	0	0	0
188	4	3	5	5	7	7	3	3	4	3	3	3	3	4	5	3	5	4	4	4	9999	4	4	4	3	3	3	5	5	3	3	3	4	3	4	4	4	4	4	4	3	4	1	0	0	0	0	0	0
189	6	6	5	5	1	1	1	1	1	3	2	4	3	2	2	5	5	5	2	2	5	4	3	8	1	3	4	1	1	1	2	3	4	2	2	2	1	3	2	1	2	2	1	1	1	0	0	0	0
190	5	3	7	7	7	5	2	2	2	1	1	1	1	1	1	4	1	5	1	1	5	4	7	5	5	7	9	8	8	2	1	2	3	2	2	2	2	3	2	1	2	2	1	0	0	0	0	0	0
191	4	4	2	1	3	3	2	4	4	4	2	2	3	4	4	2	4	4	3	5	3	4	7	8	8	7	10	3	1	2	5	4	2	2	1	1	2	2	1	1	1	1	1	0	0	0	0	0	0
192	6	6	4	5	6	5	3	1	3	4	4	4	3	5	5	1	5	2	5	5	1	4	1	3	3	3	4	3	2	4	4	4	4	4	4	4	4	4	4	4	4	4	0	0	0	0	0	0	0
193	5	4	4	5	6	5	3	3	2	4	4	3	5	4	5	4	5	2	5	5	3	4	6	5	7	9	3	1	3	3	4	4	5	3	3	3	3	4	9999	2	2	2	1	0	0	0	0	0	0
196	2	2	6	6	1	1	1	4	4	4	4	4	4	3	4	3	4	4	3	5	5	4	9	8	8	7	7	6	6	2	5	5	5	5	5	5	3	4	4	5	5	5	1	0	1	0	1	0	0
197	2	2	2	6	3	3	1	2	4	2	4	3	3	4	2	4	4	4	2	3	3	4	1	2	1	1	3	1	1	3	3	3	4	3	4	4	4	3	3	2	5	2	0	1	1	0	1	0	0
198	4	5	3	3	6	5	3	2	4	3	4	4	4	4	3	4	4	5	3	4	4	4	3	7	9	3	2	2	3	4	3	3	2	4	2	3	4	4	2	4	4	3	1	0	0	0	0	0	0
199	2	2	2	2	1	2	1	2	3	1	2	1	3	2	1	5	2	5	1	1	5	4	8	8	7	8	7	8	5	1	1	1	1	1	1	1	1	1	1	1	1	1	0	0	0	0	0	0	0
200	6	6	7	7	7	7	1	5	2	4	2	5	4	5	5	1	5	4	4	5	1	4	3	5	1	3	1	1	1	5	5	5	5	4	5	4	4	4	5	4	2	4	1	0	1	0	0	0	0
201	7	7	7	7	7	7	1	1	1	1	1	5	1	1	1	5	1	1	4	5	5	4	10	10	10	8	10	10	8	5	5	1	5	1	5	5	1	5	5	2	5	2	1	1	1	1	1	1	0
203	6	7	3	4	5	5	1	5	1	3	1	5	5	5	5	2	5	4	5	5	4	4	3	9	1	2	1	1	1	5	1	5	4	1	4	5	3	5	4	2	2	2	1	0	1	0	0	0	0
206	5	5	7	7	6	7	3	1	5	3	1	5	5	5	5	1	5	5	3	4	4	4	7	5	6	3	1	1	1	5	5	5	5	4	1	5	5	5	5	4	5	5	0	0	0	0	0	0	0
207	2	4	1	3	4	4	3	5	5	5	2	5	5	5	5	5	5	5	5	5	5	4	9	4	3	2	1	7	10	5	5	5	5	5	3	5	4	5	4	5	4	4	0	0	0	0	0	0	0
208	3	3	7	6	6	6	2	2	3	4	4	5	4	5	5	2	5	4	2	4	5	4	8	9	9	9	9	7	1	1	3	4	3	2	2	3	1	1	3	2	4	3	0	0	0	0	0	0	0
209	7	6	6	6	7	2	3	2	3	2	2	4	4	1	4	2	2	4	5	3	4	4	3	6	3	4	7	8	6	5	5	5	5	4	2	5	4	5	3	5	3	4	0	0	0	0	0	0	0
210	3	3	5	5	3	4	3	3	4	2	4	4	2	4	5	3	4	4	4	5	3	4	5	7	5	5	5	1	1	2	2	1	4	2	2	3	2	3	2	2	2	2	0	0	0	0	1	0	0
211	9999	9999	1	9999	9999	9999	1	3	2	1	4	2	2	3	3	5	1	2	1	2	4	4	5	4	3	7	9999	3	1	3	1	2	2	2	1	4	2	3	1	1	1	1	1	0	0	1	0	0	0
212	3	4	4	5	6	5	3	2	2	4	5	2	2	4	2	3	2	5	3	4	4	4	9	7	8	9	5	6	5	2	3	2	1	1	2	3	2	4	3	3	2	1	0	1	0	0	0	0	0
213	5	4	3	3	6	5	3	3	3	2	4	3	4	4	4	3	3	2	3	4	2	4	3	5	5	6	7	8	7	4	4	4	4	3	5	3	3	3	3	3	3	3	0	0	0	0	0	0	0
215	6	6	3	6	2	2	2	2	5	3	4	5	4	4	4	3	3	2	4	5	5	4	10	10	8	9	10	10	1	3	3	5	5	3	4	4	4	5	4	3	4	4	1	1	1	0	0	0	0
216	5	6	5	5	5	6	3	4	3	4	4	3	3	3	3	4	5	4	4	4	4	4	2	1	2	2	2	2	2	3	3	4	4	5	3	4	3	4	4	4	3	4	1	0	0	0	1	0	0
218	3	2	4	5	3	3	3	2	2	2	1	5	4	5	4	1	4	4	4	4	3	4	8	8	6	6	9	7	1	3	4	4	3	2	3	4	3	3	1	2	3	2	1	0	1	0	1	0	0
219	3	3	4	4	5	5	4	3	3	3	3	3	3	2	4	5	3	4	2	4	5	4	7	7	7	9	5	4	3	4	3	4	2	2	2	2	3	2	4	2	2	3	1	0	1	0	0	0	0
220	4	5	5	5	6	6	2	2	2	3	3	4	3	2	3	3	4	4	3	4	3	4	7	6	6	8	4	6	6	3	3	4	3	3	4	3	3	4	5	3	3	4	0	0	0	0	0	0	0
221	6	7	4	5	5	6	5	4	3	4	3	4	4	2	2	1	4	4	1	4	5	4	5	6	4	7	9	6	6	4	3	4	3	3	5	3	5	4	3	4	3	4	0	0	0	0	0	0	0
222	6	6	6	7	6	6	3	2	3	3	3	3	3	5	5	2	3	5	2	5	2	4	3	6	5	8	6	4	4	3	4	3	4	3	3	4	3	3	3	3	3	3	1	1	0	0	0	0	0
[truncated: 50 more columns]
